# Supplementary material
Source: publisher figshare collection journal article supplement (https://acs.figshare.com/ndownloader/files/9484348)
Supplement: Supplementary file 1 [file 9484348]

## **SUPPORTING INFORMATION FILE**

# **Unraveling the Mechanism Underlying Surface Ligand Passivation of Colloidal Semiconductor Nanocrystals: A Route for Preparing Advanced Hybrid Nanomaterials**

Meghan B. Teunis,<sup>1</sup> Thakshila Liyanage,<sup>1</sup> Sukanta Dolai,<sup>1</sup> Barry B. Muhoberac,<sup>1</sup> Rajesh Sardar\*,<sup>1</sup>, and  
Mangilal Agarwal\*,<sup>1,2</sup>

<sup>1</sup>Department of Chemistry and Chemical Biology, Indiana University-Purdue University Indianapolis,  
402 N. Blackford Street, Indianapolis, Indiana 46202, United States

<sup>2</sup>Department of Mechanical Engineering, Indiana University-Purdue University Indianapolis  
723 W. Michigan Stree, Indianapolis, Indiana 46202, United States

\*Corresponding author: [rsardar@iupui.edu](mailto:rsardar@iupui.edu); [agarwal@iupui.edu](mailto:agarwal@iupui.edu)

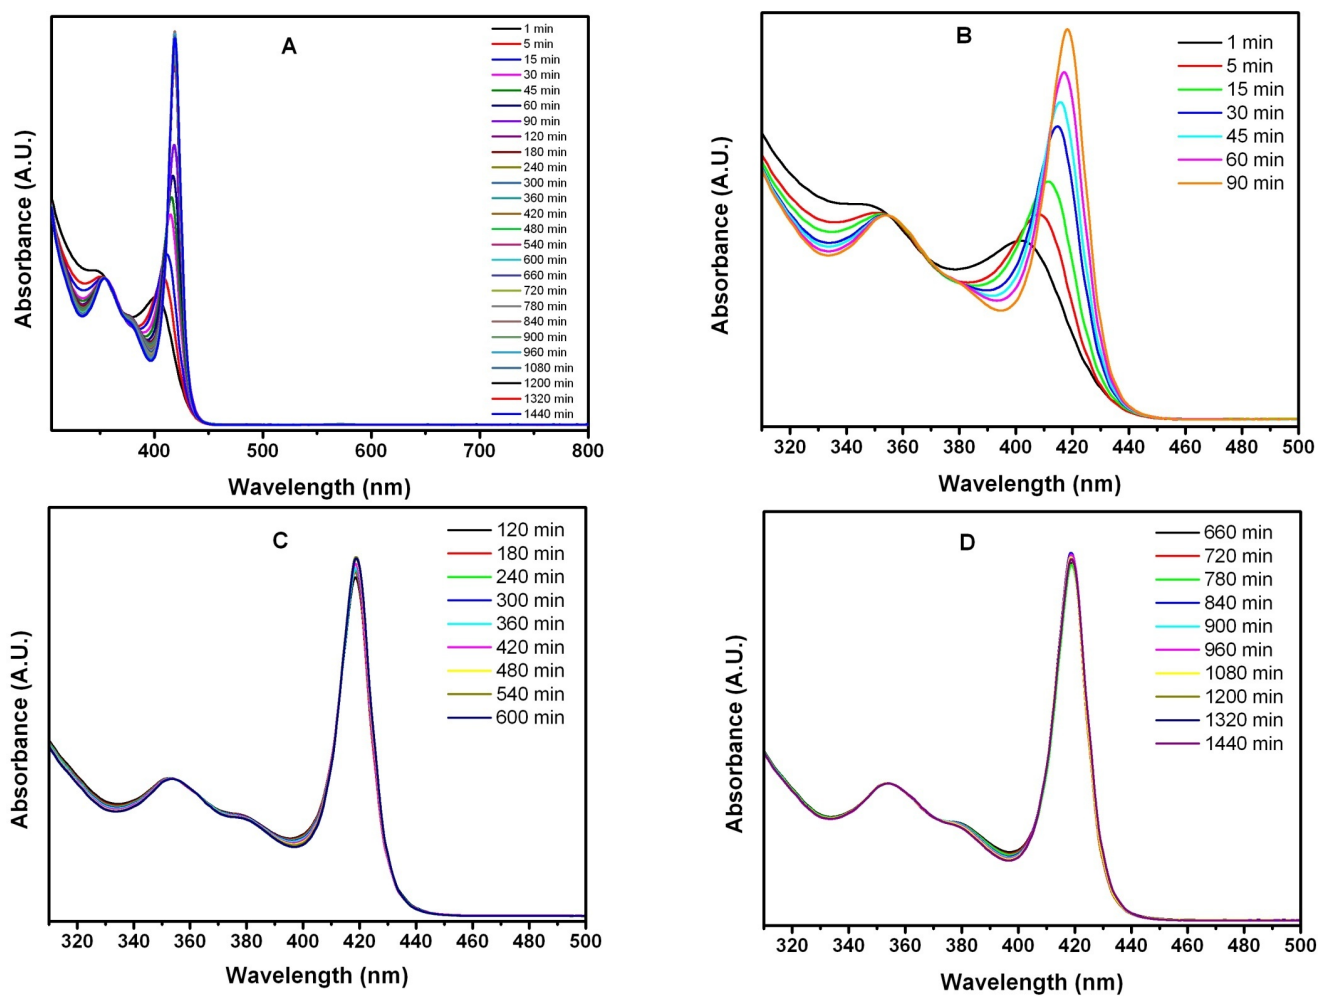

**Figure S1:** Time-dependent UV-vis absorption spectra of  $(\text{CdSe})_{33/34}$  CSNC formation at room temperature. Over the time interval 240-1440 min, no significant changes in the absorption peak positions or shapes were observed.

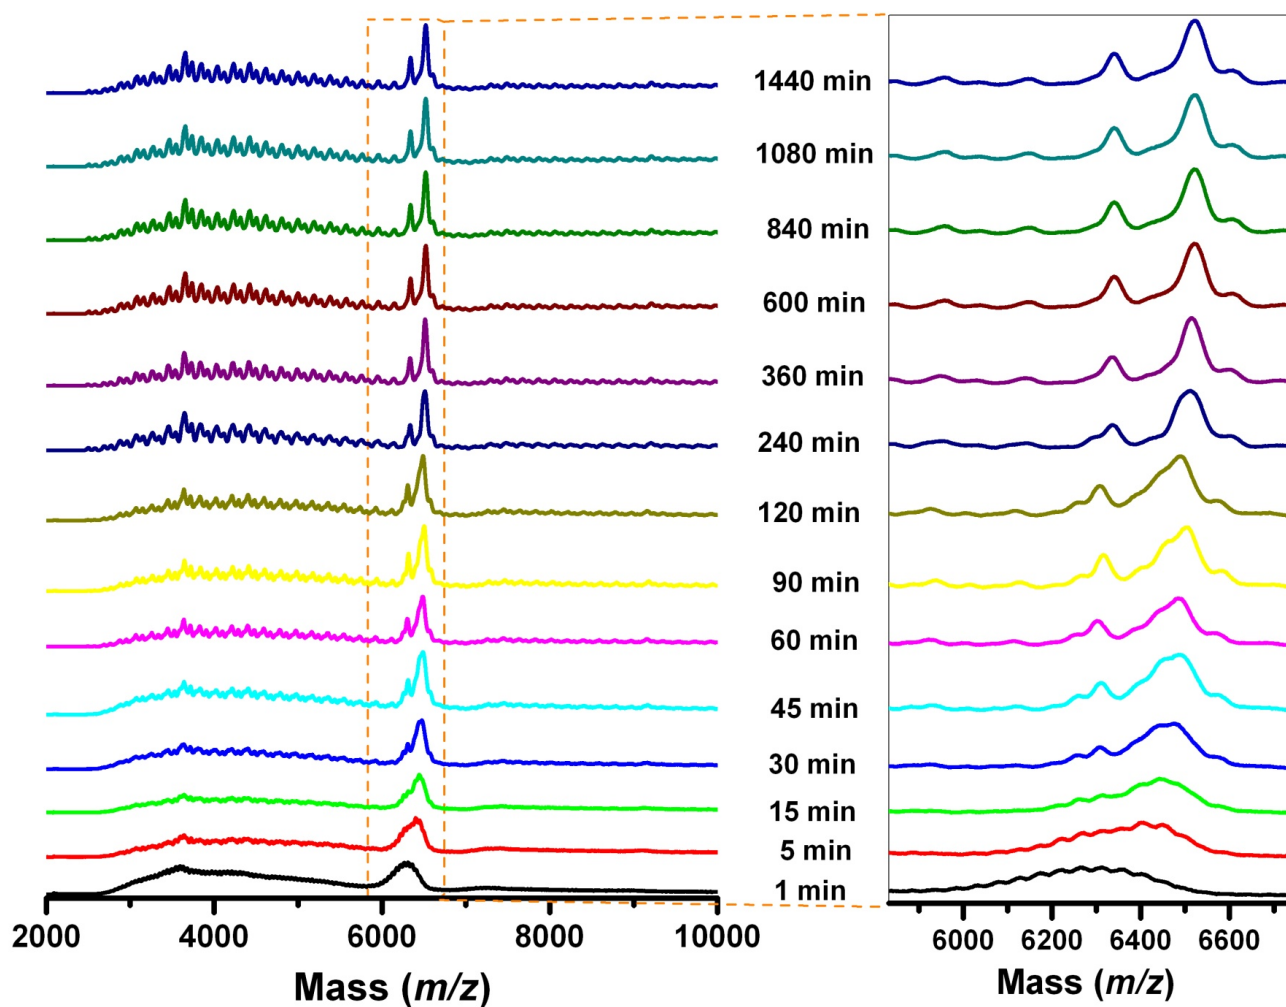

**Figure S2:** Time-dependent MALDI-TOF-MS analysis of  $(\text{CdSe})_{33/34}$  CSNCs during their formation. Over the time interval 240-1440 min, no significant changes in the MS peak positions or shapes were observed.

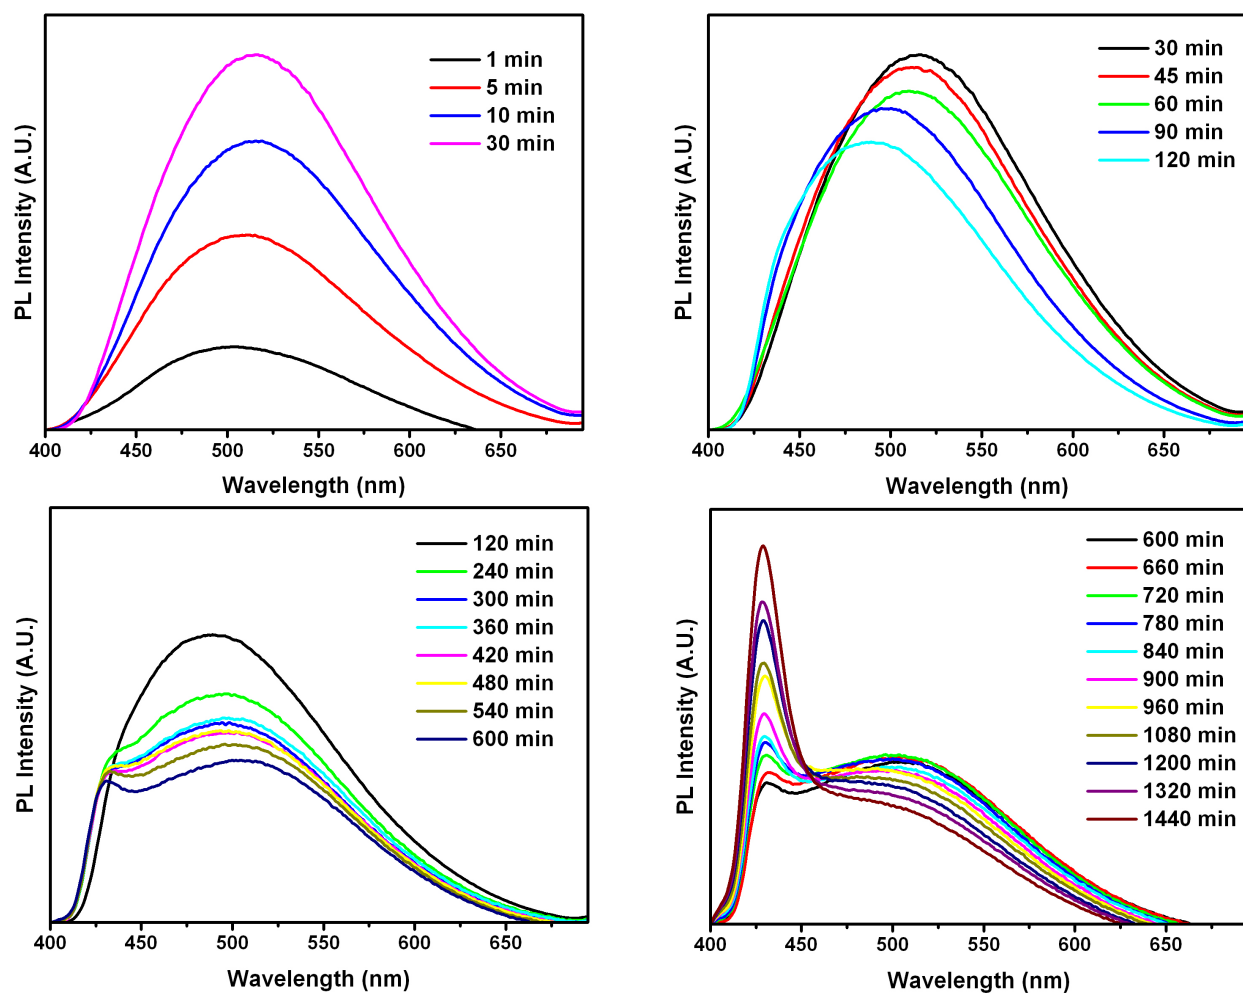

**Figure S3:** Time dependent PL spectra of  $(\text{CdSe})_{33/34}$  CSNC formation at room temperature. Throughout the synthesis, we continually observed changes in the the broadband PL peak positions and shape. However after 600 min, the band-edge peak position remained constant and the intensity of the peak increased over the time.

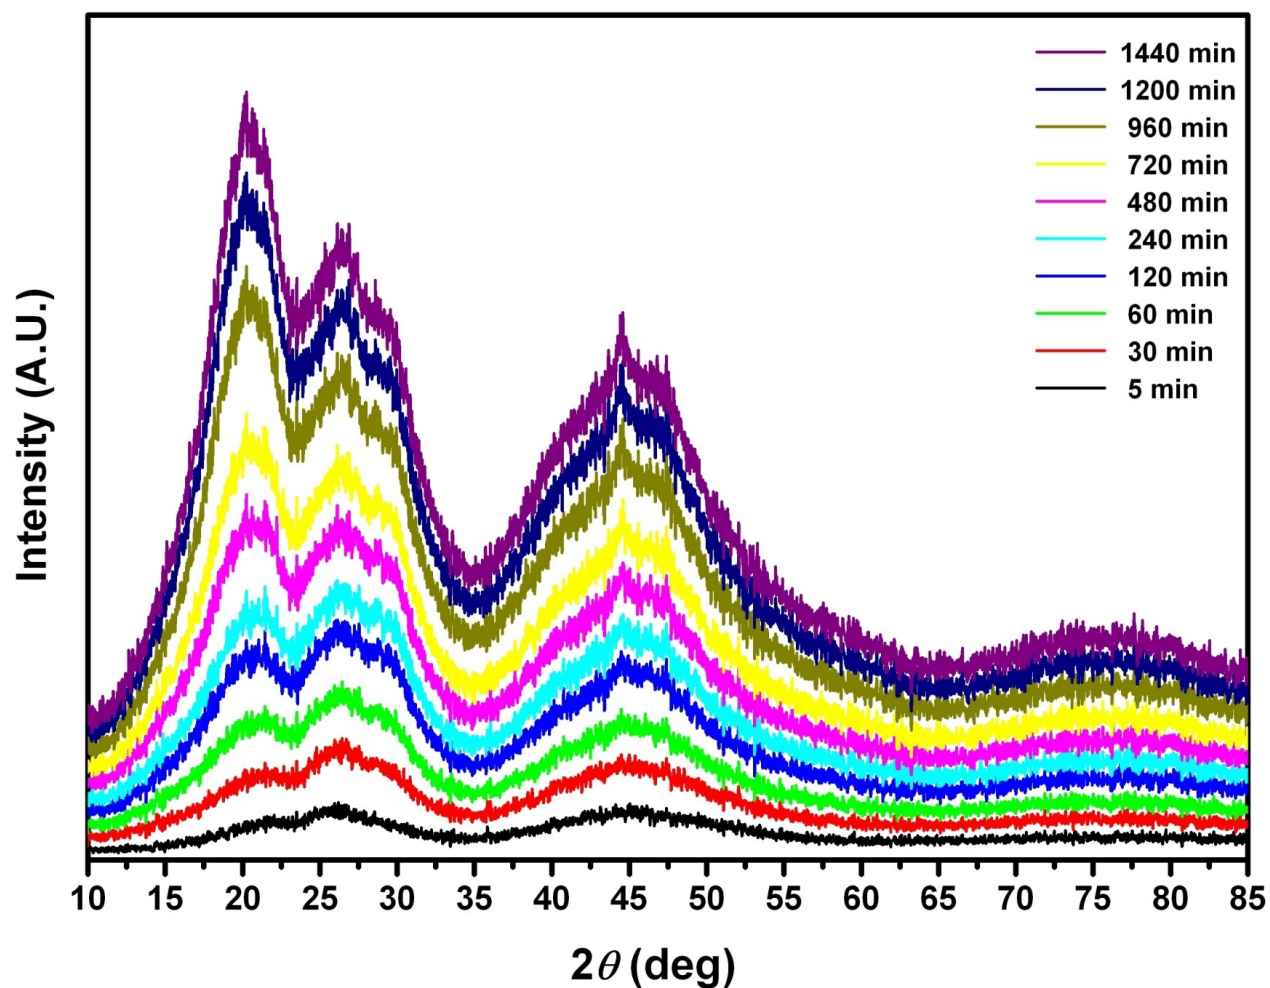

**Figure S4:** Time-dependent XRD spectra of  $(\text{CdSe})_{33/34}$  CSNC formation. The peaks are characteristic of wurtzite crystal structure. Over the time interval 240-1440 min, no significant changes in the XRD peak positions or shape were observed.

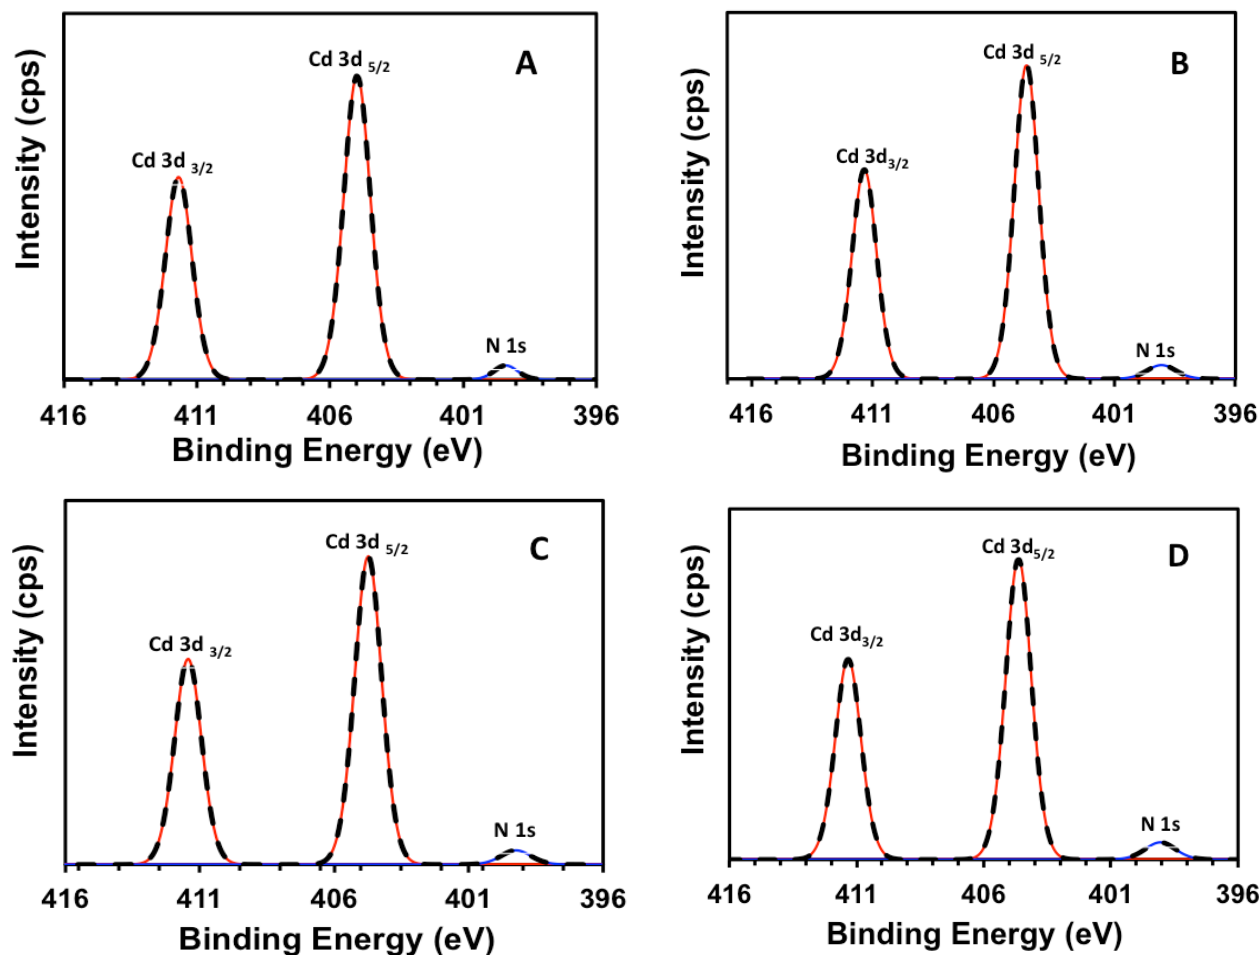

**Figure S5:** Time-dependent XPS spectra of OLA-passivated (CdSe)<sub>33/34</sub> CSNCs: (A) 240, (B) 600, (C) 900, and (D) 1200 min after the injection of Se precursor at room temperature.

**Table S1:** Time-dependent determination of number of OLA per (CdSe)<sub>33/34</sub> CSNC through XPS analysis.

| Time (min) | Integrated Cd 3d Peak Area | Integrated N 1s Peak Area | Cd:N Ratio | # OLA Ligands/ CdSe Nanocrystal |
|------------|----------------------------|---------------------------|------------|---------------------------------|
| 240        | 3124.7                     | 579.0                     | 5.93       | 6.3                             |
| 300        | 3114.0                     | 788.4                     | 3.95       | 8.6                             |
| 420        | 3126.4                     | 1042.2                    | 3.23       | 10.5                            |
| 600        | 3180.7                     | 1144.2                    | 2.78       | 12.4                            |
| 720        | 3123.8                     | 1269.2                    | 2.41       | 14.1                            |
| 840        | 3174.6                     | 1469.7                    | 2.16       | 15.7                            |
| 960        | 3180.7                     | 1423.5                    | 2.19       | 16.2                            |
| 1200       | 3119.7                     | 1616.4                    | 1.93       | 17.6                            |
| 1440       | 3110.4                     | 1654.4                    | 1.88       | 18.0                            |

**Table S2:** Time-dependent determination of number of OLA per (CdSe)<sub>33/34</sub> CSNC through <sup>1</sup>H NMR analysis using ferrocene as an internal standard.

| Time (min) | NMR 5.35 integration | # OLA Ligands / CdSe Nanocrystal |
|------------|----------------------|----------------------------------|
| 240        | 0.09                 | 7.2                              |
| 300        | 0.16                 | 9.3                              |
| 420        | 0.30                 | 11.4                             |
| 600        | 0.39                 | 13.1                             |
| 720        | 0.49                 | 15.8                             |
| 840        | 0.65                 | 16.4                             |
| 960        | 0.75                 | 17.3                             |
| 1200       | 0.78                 | 18.1                             |
| 1440       | 0.84                 | 18.4                             |

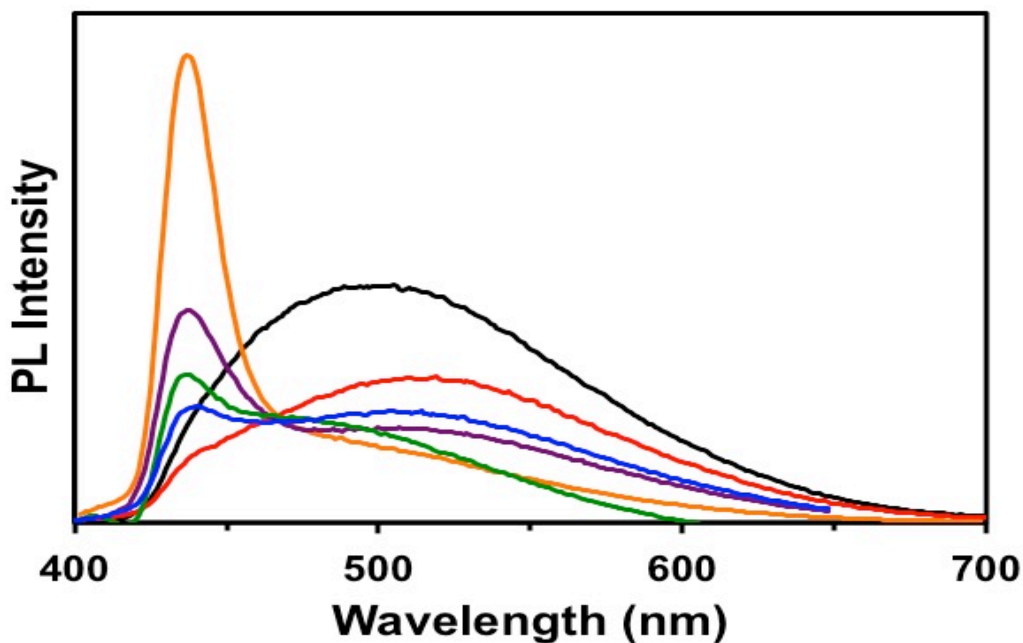

**Figure S6A:** Ex-situ surface modification of (CdSe)<sub>33/34</sub> CSNCs with ex-situ addition of OLA at room temperature. Black: 0 min (as synthesized and purified CSNCs). Time-dependent changes after addition of 5 mM OLA: Red, 240 min; Blue, 480 min; Green, 720 min; Purple, 1440 min; and Orange, 2880 min.



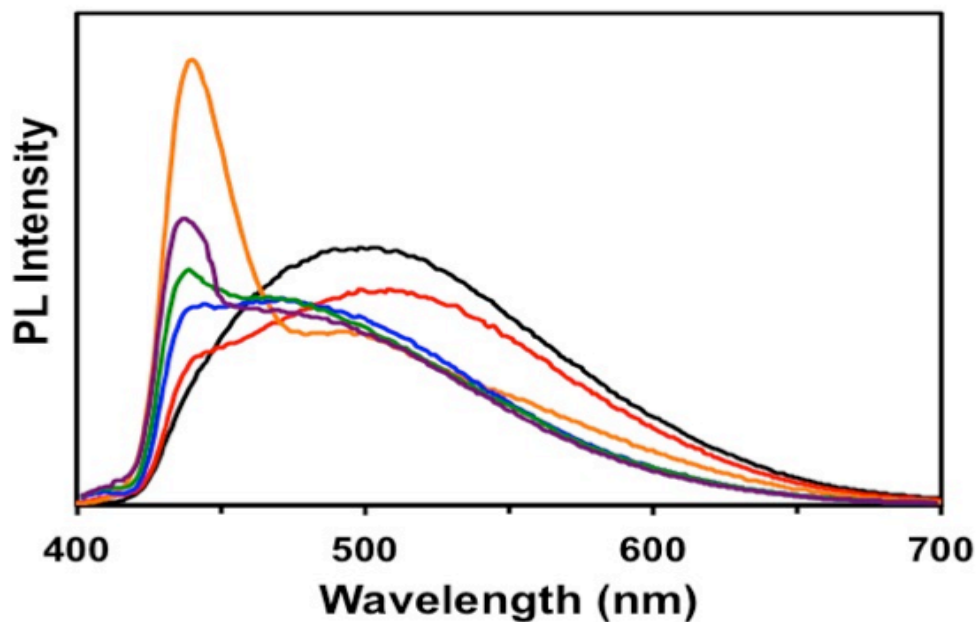

**Figure S6B:** Ex-situ surface modification of (CdSe)<sub>33/34</sub> CSNCs with OCA at room temperature. Black: 0 min (as synthesized and purified CSNCs). Time-dependent changes after addition of 5 mM OCA: Red, 120 min; Blue, 240 min; Green, 480 min; Purple, 720 min; and Orange: 1080 min.

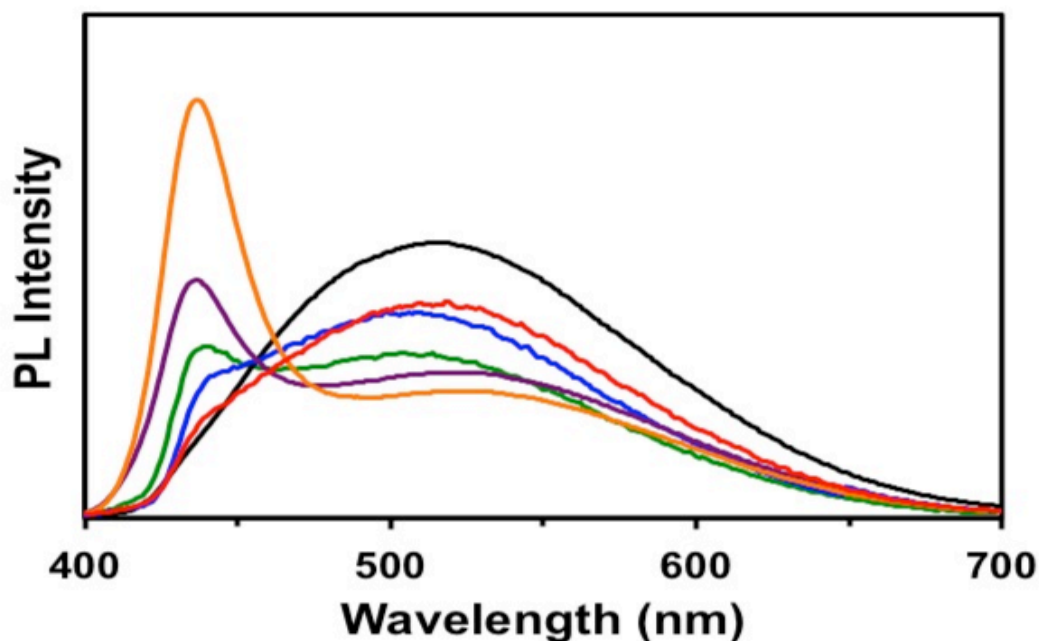

**Figure S6C:** Ex-situ surface modification of (CdSe)<sub>33/34</sub> CSNCs with DCA at room temperature. Black: 0 min (as synthesized and purified CSNCs). Time-dependent changes after addition of 5 mM DCA: Red, 120 min; Blue, 240 min; Green, 400 min; Purple, 720 min; and Orange, 1440 min.



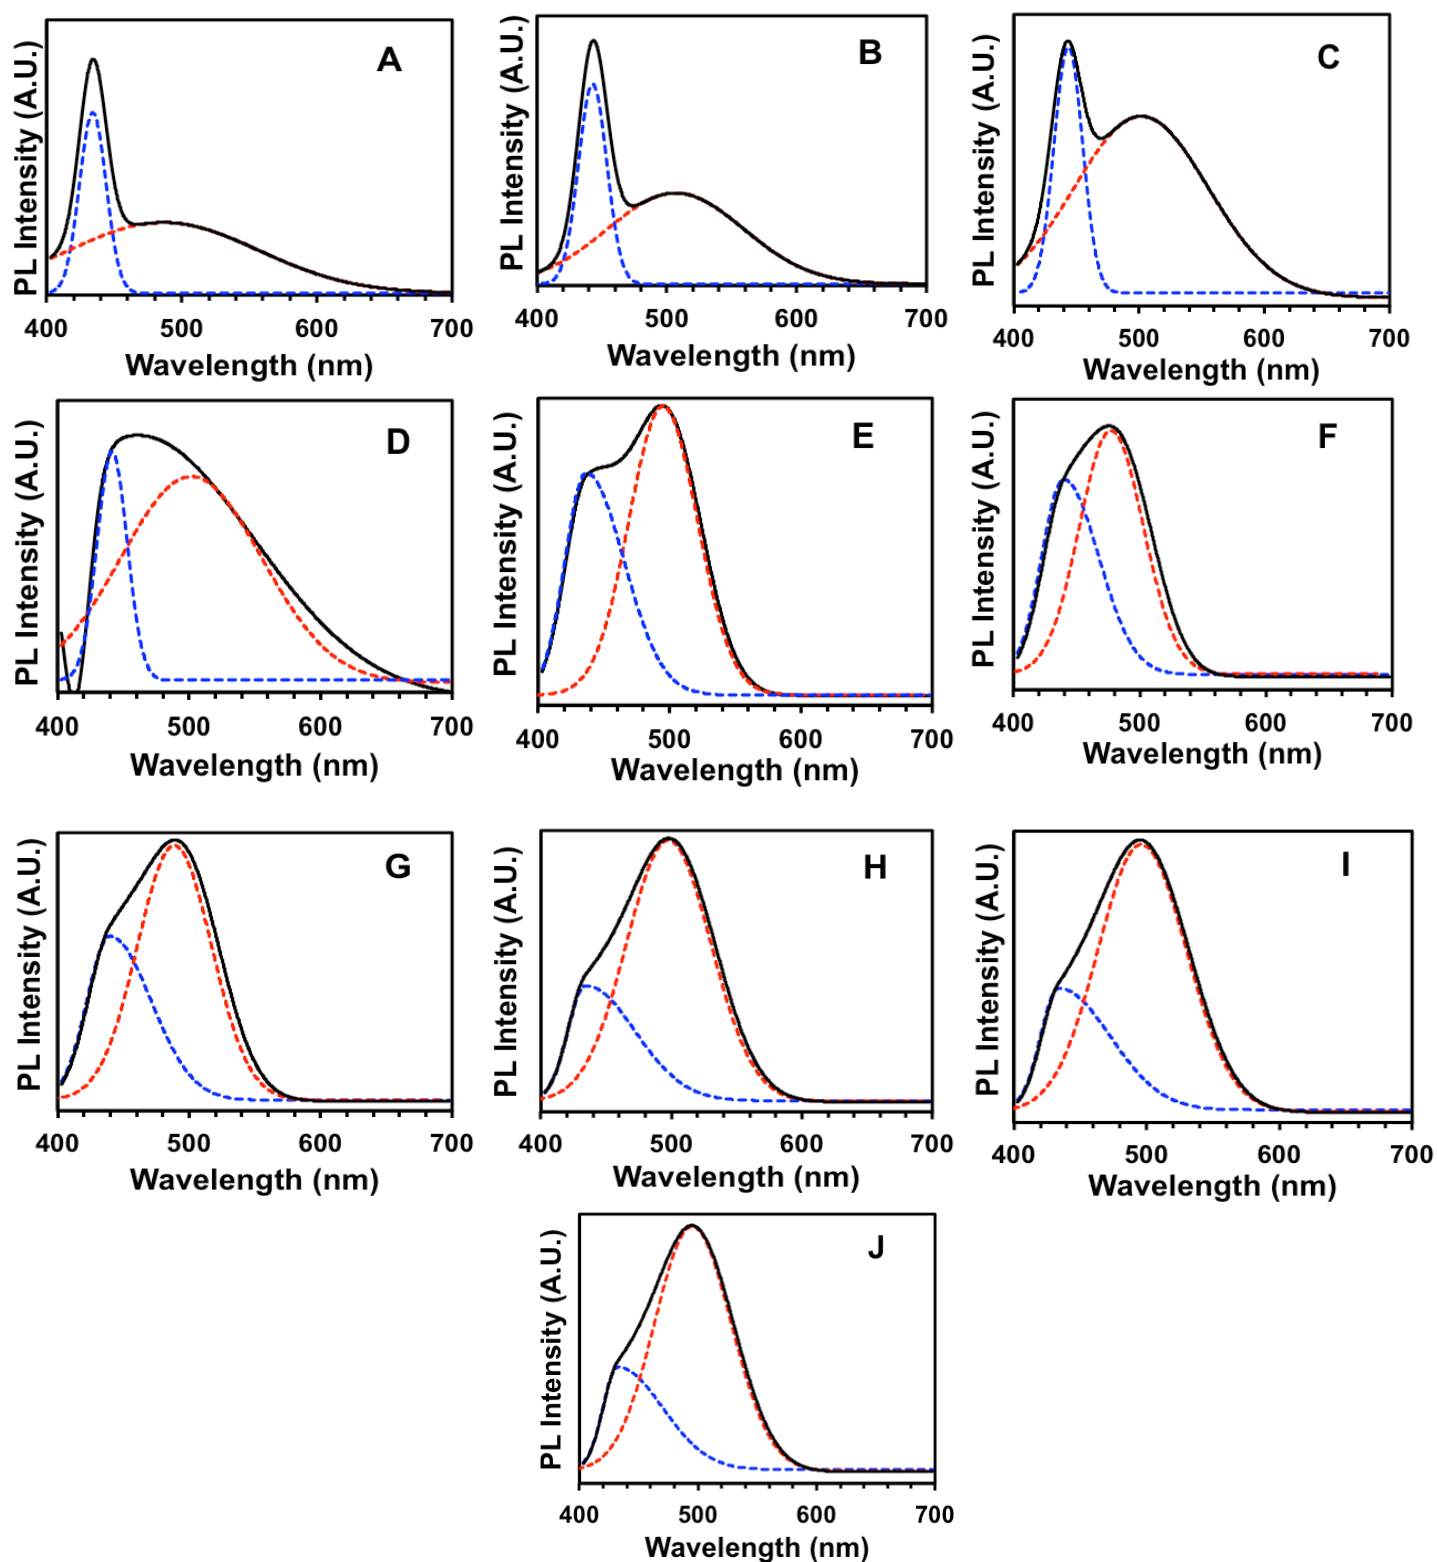

**Figure S7:** Ex-situ surface modification of  $(\text{CdSe})_{33/34}$  CSNCs with OLA at room temperature. A stock solution of  $0.12 \mu\text{M}$   $(\text{CdSe})_{33/34}$  CSNCs was prepared in toluene. Various

concentrations of OLA examined: (A) 2000  $\mu\text{M}$ , (B) 1000  $\mu\text{M}$ , (C) 500  $\mu\text{M}$ , (D) 200  $\mu\text{M}$ , (E) 50  $\mu\text{M}$ , (F) 20  $\mu\text{M}$ , (G) 5  $\mu\text{M}$ , (H) 1  $\mu\text{M}$ , (I) 0.5  $\mu\text{M}$ , and (J) 0.2  $\mu\text{M}$  were added, and the reactions were monitored by PL until a stable intensity was observed.

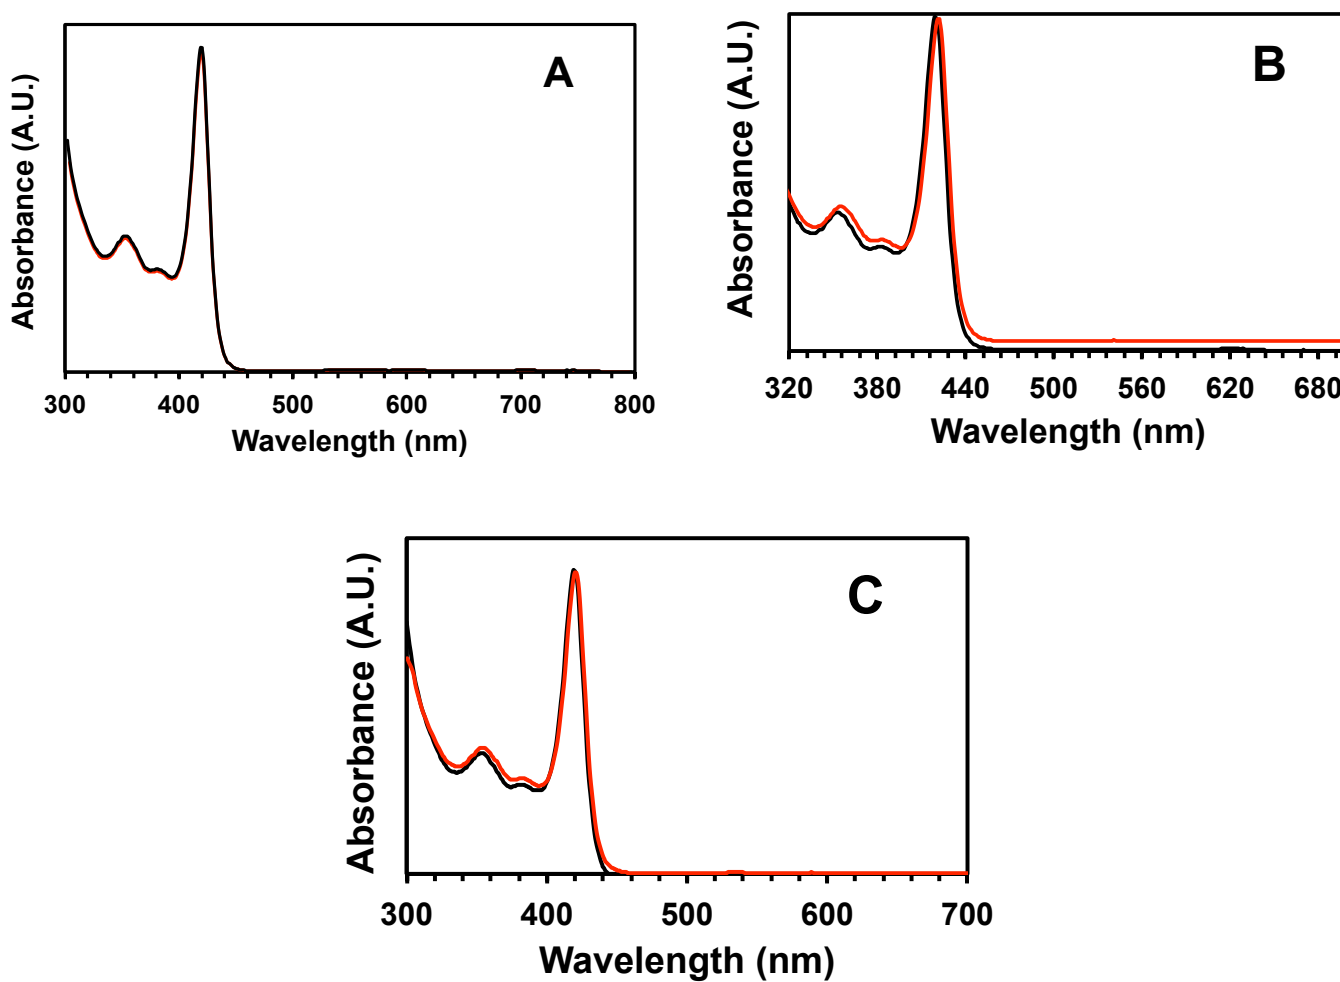

**Figure S8.** UV-vis spectra of OLA-passivated (black lines) and mixed (A) OLA-/AHA-, (B) OLA-/HXA-, and (C) OLA-/APTES-passivated (red lines)  $(\text{CdSe})_{33/34}$  CSNCs.

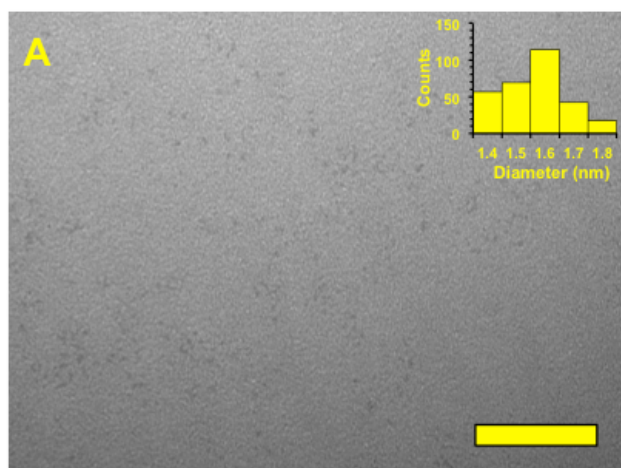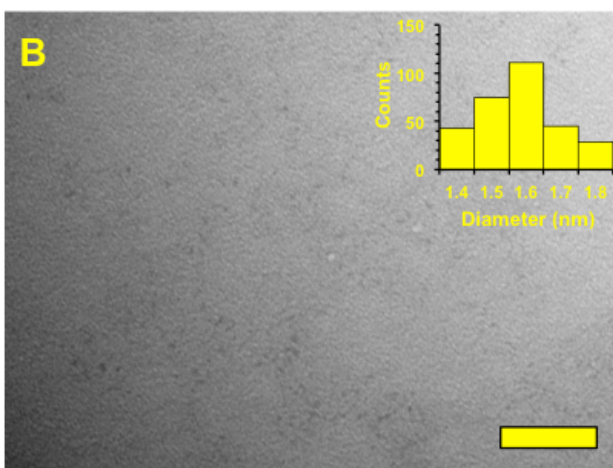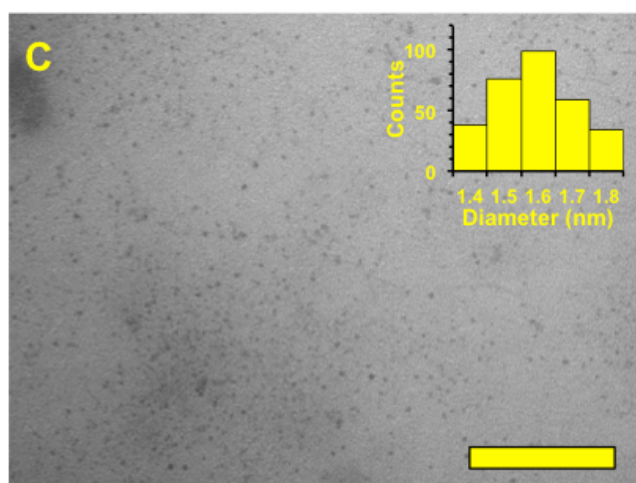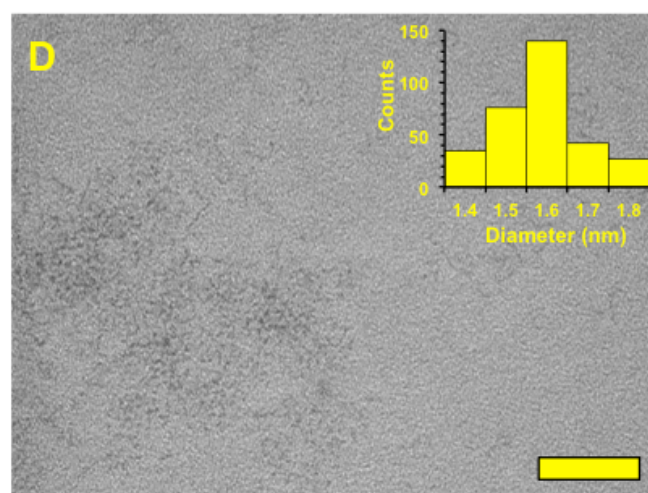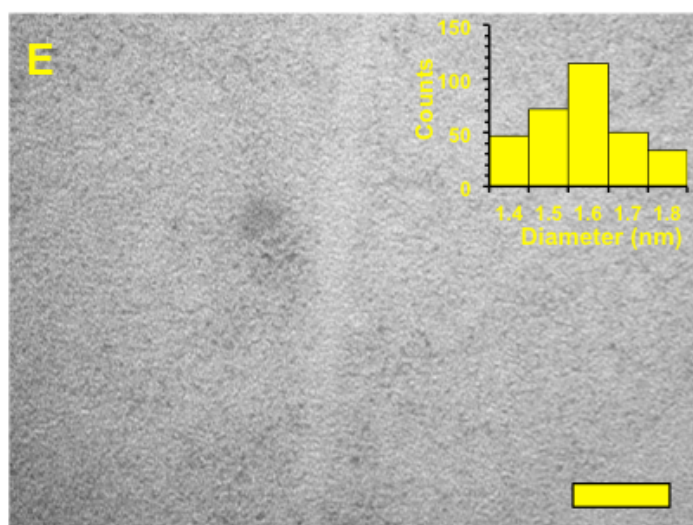

**Figure S9.** TEM image of (A) partially OLA-passivated, and mixed (B) OLA-/AHA-, (C) OLA-/AAB-, (D) OLA-/HXA-, and (E) OLA-/APTES-passivated (red lines) (CdSe)<sub>33/34</sub> CSNCs.

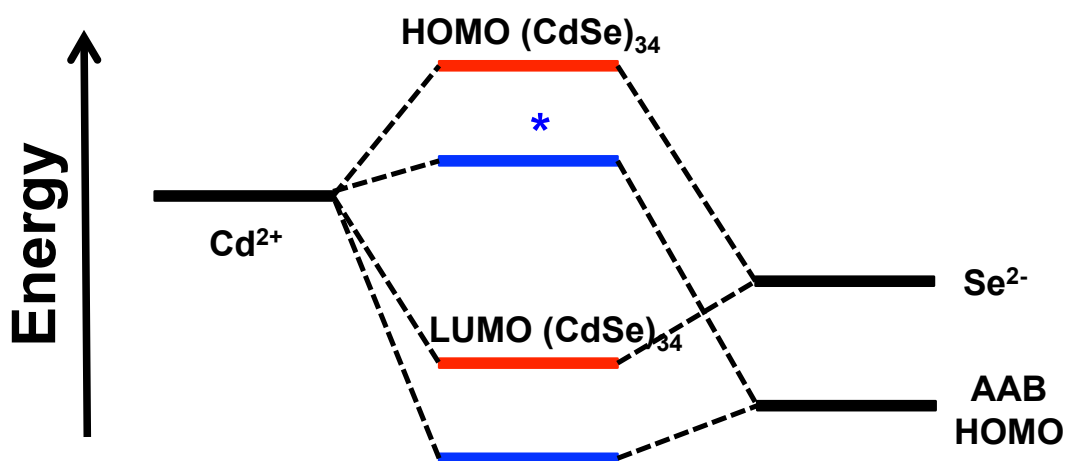

**Figure S10.** Simplified molecular orbital diagram depicting interaction of AAB with  $(\text{CdSe})_{33/34}$  CSNC as previously proposed for CdSe CSNC-aniline conjugates by Weiss and coworkers.<sup>1</sup> AAB is a weak s-donating ligand. Therefore the interaction between a surface Cd site and amine from AAB will form an antibonding orbital (blue star) below the HOMO of the CSNC and this antibonding orbital acts as a mid-gap trap state where a photoexcited electron may become trapped, resulting in a broadened PL band.

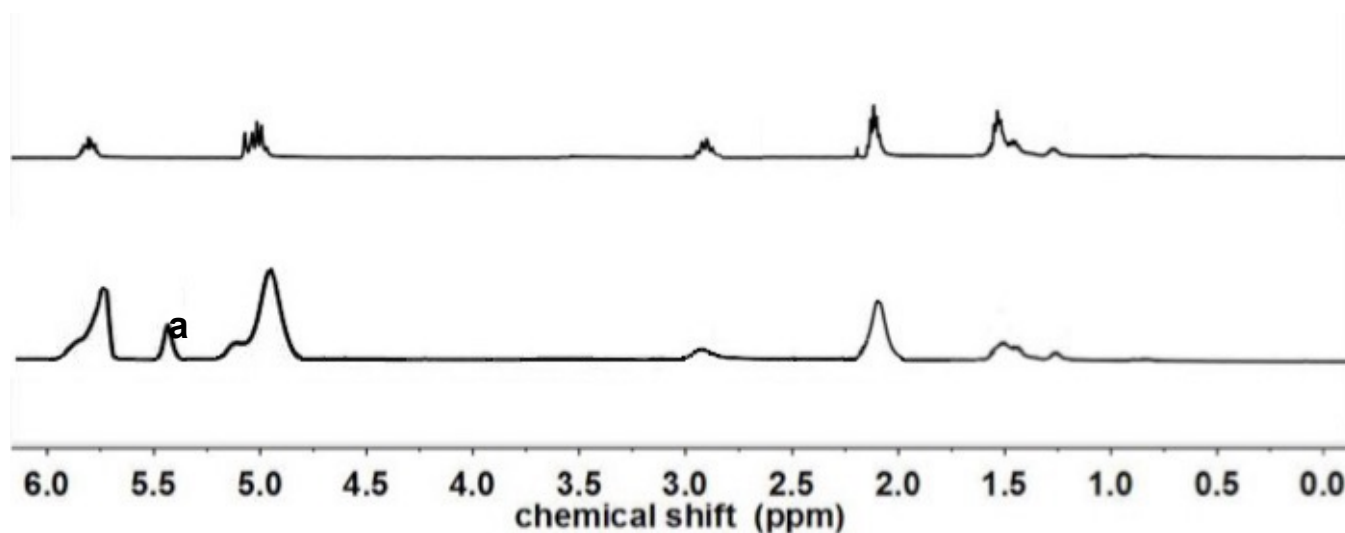

**Figure S11.**  $^1\text{H}$  NMR spectrum of mixed OLA-/HXA-passivated  $(\text{CdSe})_{33/34}$  CSNCs (bottom). The characteristic vinyl (a,  $-\text{CH}=\text{CH}-$ ) resonance of OLA at 5.34 ppm, and double bond ( $-\text{CH}=\text{CH}_2$ ) resonances at 5.83 and 4.88 ppm from HXA were observed. The NMR peak broadening is because of spin-spin relaxation and dipole broadening from surface bound ligand. A sharp resonances of  $-\text{CH}=\text{CH}_2$  are observed for pure AHA (top). The NMR data equivocally prove the mixed surface ligation of  $(\text{CdSe})_{33/34}$  CSNCs.

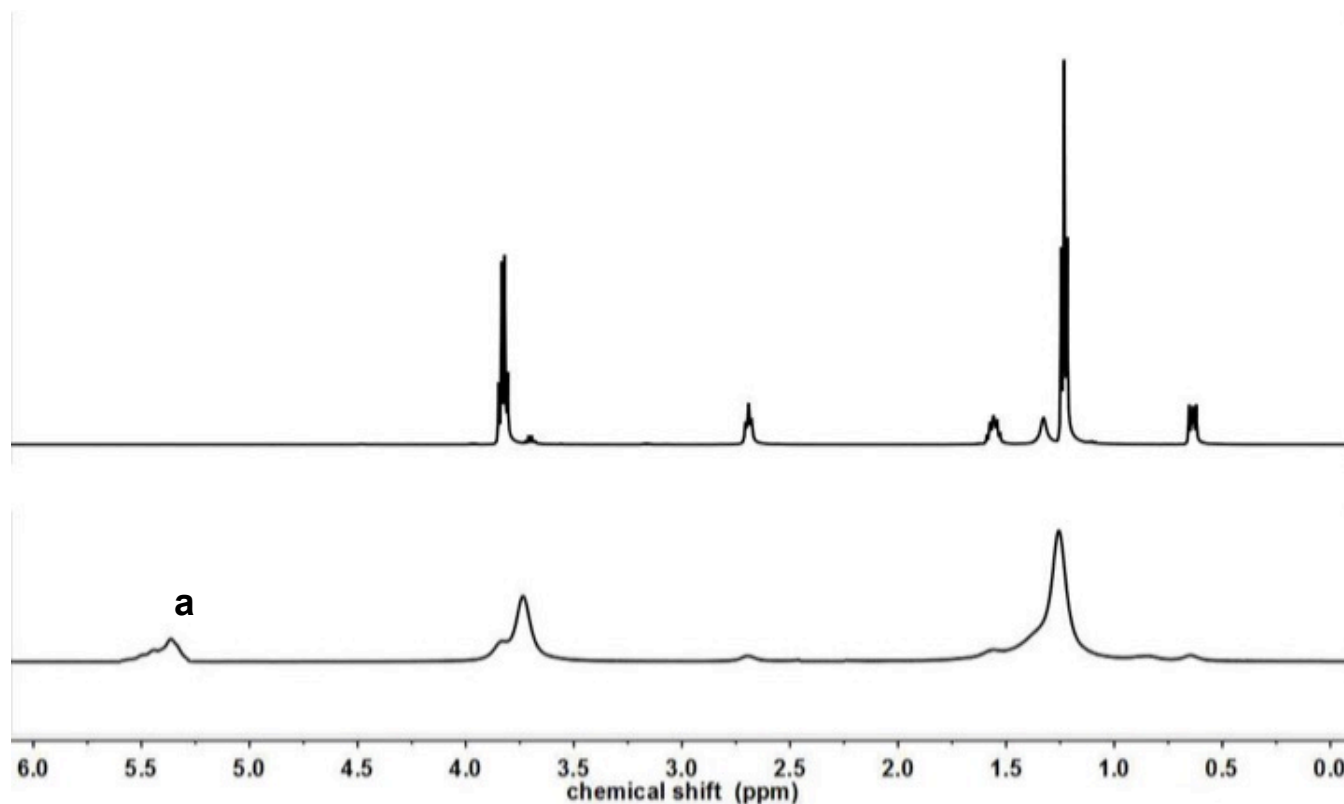

**Figure S12.**  $^1\text{H}$  NMR spectrum of mixed OLA-/APTES-passivated  $(\text{CdSe})_{33/34}$  CSNCs (bottom). The characteristic vinyl (a,  $-\text{CH}=\text{CH}-$ ) resonance of OLA at 5.34 ppm and a-methylene ( $-\text{Si}-\text{O}-\text{CH}_2$ ) resonance at 3.83 ppm from APTES are observed. The NMR peak broadening is because of spin-spin relaxation and dipole broadening from surface bound ligand. A sharp resonance of  $-\text{Si}-\text{O}-\text{CH}_2$  is observed for pure APTES (top). The NMR data equivocally prove the mixed surface ligation of  $(\text{CdSe})_{33/34}$  CSNCs.

## Reference

1. Morris-Cohen, A. J.; Vasilenko, V.; Amin, V. A.; Reuter, M. G.; Weiss, E. A. Model for adsorption of ligands to colloidal quantum dots with concentration-dependent surface structure. *ACS Nano* **2011**, 6, 557-565.
